# Supplementary material for: The Relationship between Fatigue and Actigraphy-Derived Sleep and Rest–Activity Patterns in Cancer Survivors
Source: PubMed Central journal article supplement (PMC8025824; doi:10.3390/curroncol28020113), 2021-03-10
Supplement: curroncol-28-00113-s001.pdf [file curroncol-28-00113-s001.pdf]

## **Supplemental Materials for**

### **The Relationship between Fatigue and Actigraphy-Derived Sleep and Rest-Activity Patterns in Cancer Survivors**

Tristan Martin, Rosie Twomey, Mary E. Medysky, John Temesi, S. Nicole Culos-Reed and Guillaume Y. Millet

#### **Listing of Supplemental Material(s):**

Supplemental Table 1: Correlation between sleep and rest-activity cycle parameters, Functional Assessment of Chronic Illness Therapy-Fatigue Scale (FACIT-F)

Supplemental Table 2: Correlation between sleep estimated parameters and Insomnia Severity Index (ISI).

Supplemental Table 1 : Correlation between sleep and rest-activity cycle parameters, Functional Assessment of Chronic Illness Therapy-Fatigue Scale (FACIT-F)

|                                     | FACIT-F            |       |    |
|-------------------------------------|--------------------|-------|----|
|                                     | Pearson            | Sig.  | N  |
| TST                                 | 0,042              | 0,696 | 87 |
| WASO                                | -,275              | 0,010 | 87 |
| SE                                  | ,258 <sup>b</sup>  | 0,016 | 87 |
| SOL <sup>np</sup>                   | -,305 <sup>b</sup> | 0,004 | 87 |
| FI                                  | -0,164             | 0,130 | 87 |
| Index activity wake %               | 0,040              | 0,712 | 87 |
| Index activity sleep %              | -,385 <sup>a</sup> | 0,000 | 87 |
| Mean wake Actigraphy                | 0,092              | 0,396 | 87 |
| Mean Sleep Actigraphy <sup>np</sup> | -,392 <sup>a</sup> | 0,001 | 87 |
| Amplitude (RA) <sup>np</sup>        | ,313 <sup>a</sup>  | 0,003 | 87 |
| Peak time                           | -,323 <sup>a</sup> | 0,002 | 87 |
| IS (stability)                      | 0,168              | 0,120 | 87 |
| IV (variability)                    | 0,015              | 0,889 | 87 |
| Bed time                            | -,263 <sup>b</sup> | 0,014 | 87 |
| Wake-up time                        | -,282 <sup>a</sup> | 0,008 | 87 |

<sup>a</sup> Correlation is significant at 0,01 level (bilateral).

<sup>b</sup> Correlation is significant at 0,05 level (bilateral).

<sup>np</sup> indicate non parametric spearman correlation test

Supplemental Table 2: Correlation between sleep estimated parameters and Insomnia Severity Index (ISI).

|                   | ISI                |       |    |
|-------------------|--------------------|-------|----|
|                   | Pearson            | Sig.  | N  |
| FACIT-F           | -,560 <sup>a</sup> | 0,000 | 66 |
| TST               | -0,076             | 0,546 | 66 |
| WASO              | 0,242              | 0,051 | 66 |
| SE                | -,336 <sup>a</sup> | 0,006 | 66 |
| SOL <sup>np</sup> | ,303 <sup>a</sup>  | 0,013 | 66 |
| FI                | 0,064              | 0,608 | 66 |

<sup>a</sup> Correlation is significant at 0,01 level (bilateral).

<sup>b</sup> Correlation is significant at 0,05 level (bilateral).

<sup>np</sup> indicate non parametric spearman correlation test
